# Supplementary material for: The Use of Epoxy Silanes on Montmorillonite: An Effective Way to Improve Thermal and Rheological Properties of PLA/MMT Nanocomposites Obtained via “In Situ” Polymerization
Source: Hindawi journal article supplement (doi:10.1155/2015/418418), 2015-01-01
Supplement: f1 [file 418418.f1.pdf]

# The use of epoxy silanes on montmorillonite: an effective way to improve thermal and rheological properties of PLA/MMT nanocomposites obtained via “in situ” polymerization

Valentina Sabatini<sup>1,a</sup>, Hermes Farina<sup>1,a</sup>, Luca Basilissi<sup>1</sup>, Giuseppe Di Silvestro<sup>1,a</sup> and Marco A. Ortenzi<sup>1,a\*</sup>

<sup>1</sup> Dipartimento di Chimica, University of Milan, Via Golgi 19 - 20133 Milan, Italy

<sup>a</sup> CRC Materiali Polimerici (LaMPo), Dipartimento di Chimica, University of Milan, Via Golgi 19, 20133 Milano, Italy

\*Corresponding Author: Phone +390250314135; e-mail: marco.ortenzi@unimi.it

## *Supporting Information*

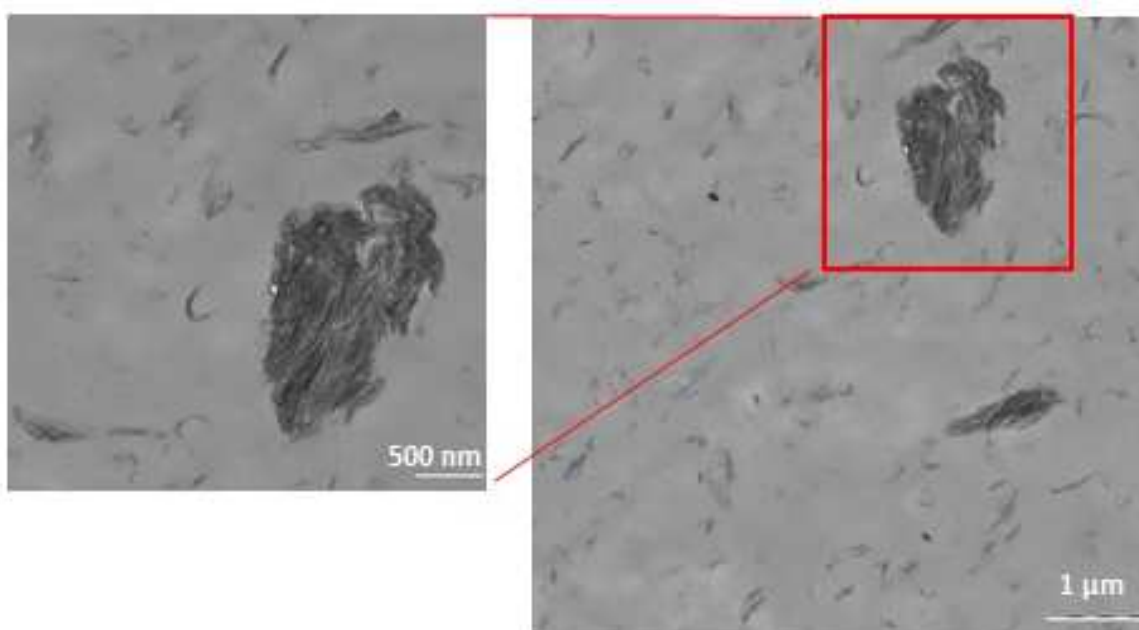

*S1. TEM images of PLA4.*

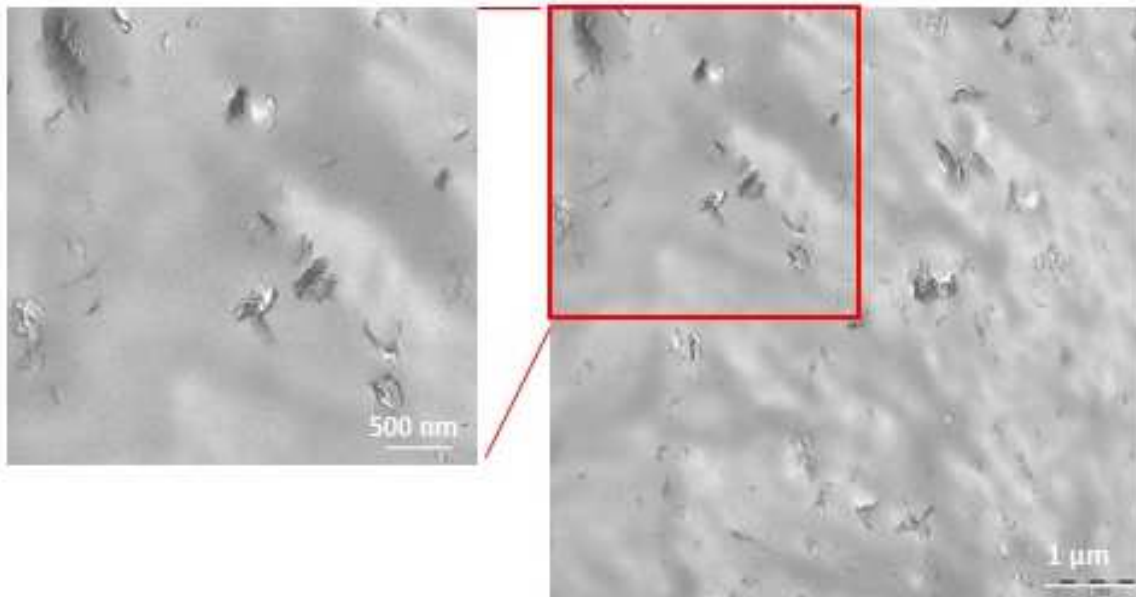

*S2. TEM images of PLA7.*

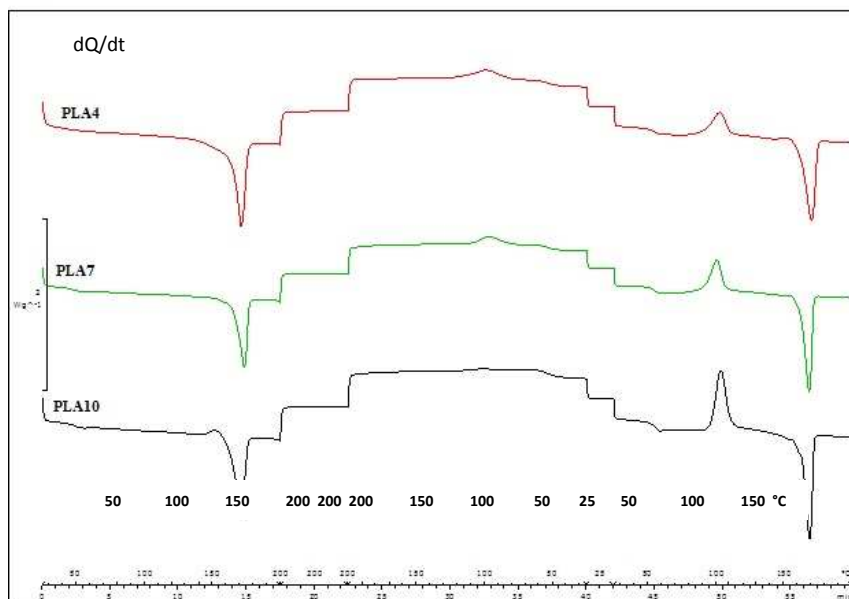

*S3. DSC thermograms of PLA 4, 7 and 10.*

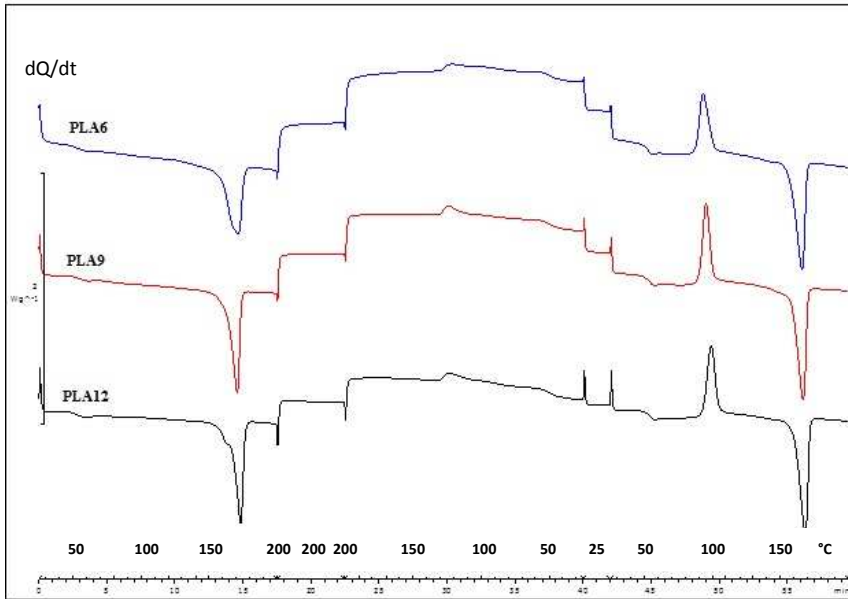

S4. DSC thermograms of PLA 6, 9 and 12.

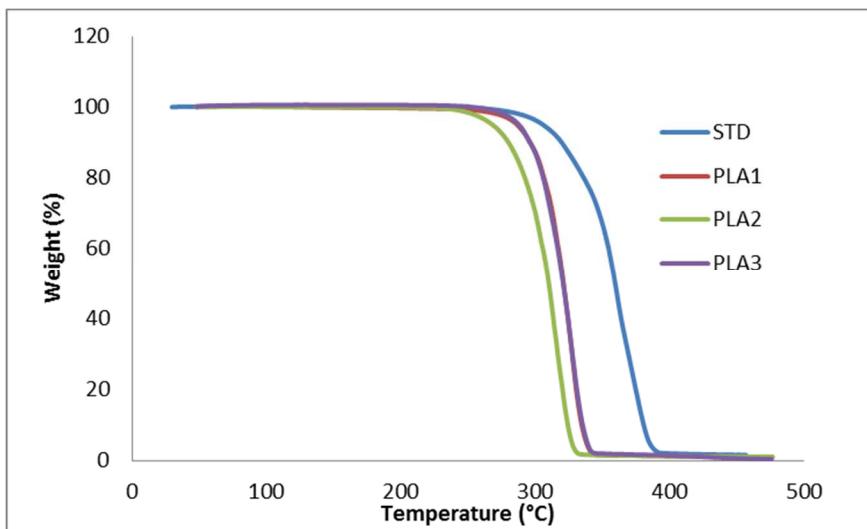

S5. TGA curves of unmodified MMT PLAs compared to STD PLA.

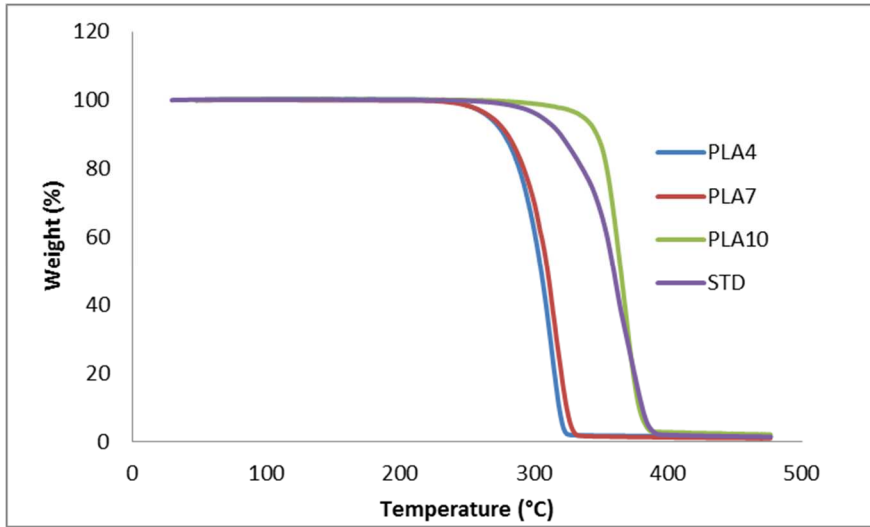

S6. TGA curves of STD compared to PLA4, 7 and 10.

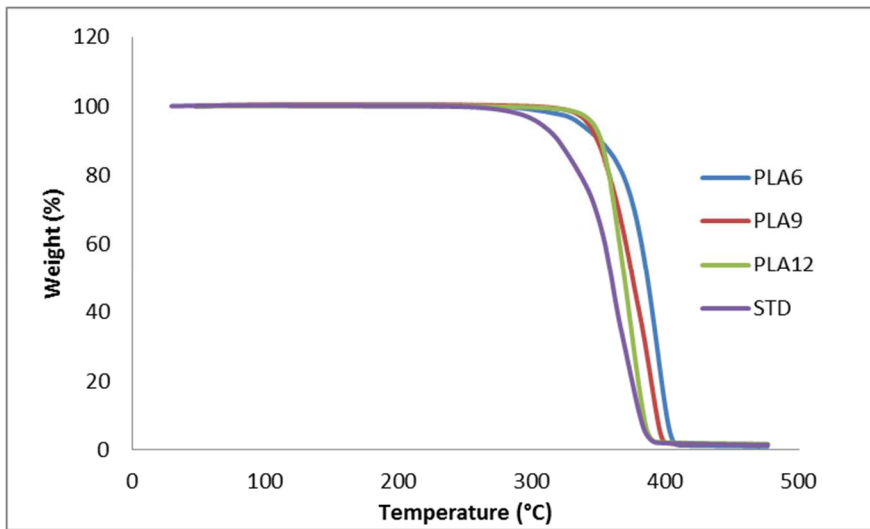

S7. TGA curves of STD compared to PLA 6, 9 and 12.
